# Supplementary material for: High ion adsorption densities of site-selective nitrogen doped carbon sheets prepared from natural lignin
Source: Royal Society of Chemistry journal article supplement (doi:10.1039/c9ra07546a), 2019-01-01
Supplement: c9ra07546a1.pdf [file c9ra07546a1.pdf]

**Supporting Information**

# High Ion Adsorption Densities of Site-selective Nitrogen Doped Carbon Sheets Prepared from Natural Lignin

Yosuke Ishii<sup>a,\*</sup>, Koki Ishigame<sup>a</sup>, Yusuke Kido<sup>a</sup>, Yuichiro Kato<sup>a</sup>, Kengo Yamamoto<sup>a</sup>, Kento Sagisaka<sup>b</sup>, Yoshiyuki Hattori<sup>b</sup>, Ayar Al-zubaidi<sup>a</sup>, Kohei Kondo<sup>a</sup> and Shinji Kawasaki<sup>a,\*</sup>

<sup>a</sup> Department of Life Science and Applied Chemistry, Nagoya Institute of Technology, Gokiso-cho, Showa-ku, Nagoya 466-8555, Japan.

<sup>b</sup> Department of Chemistry and Materials, Faculty of Textile Science and Technology, Shinshu University, 3-15-1 Tokida, Ueda 386-8567, Japan.

\* Corresponding author. E-mail: [ishii.yosuke@nitech.ac.jp](mailto:ishii.yosuke@nitech.ac.jp) [kawasaki.shunji@nitech.ac.jp](mailto:kawasaki.shunji@nitech.ac.jp)

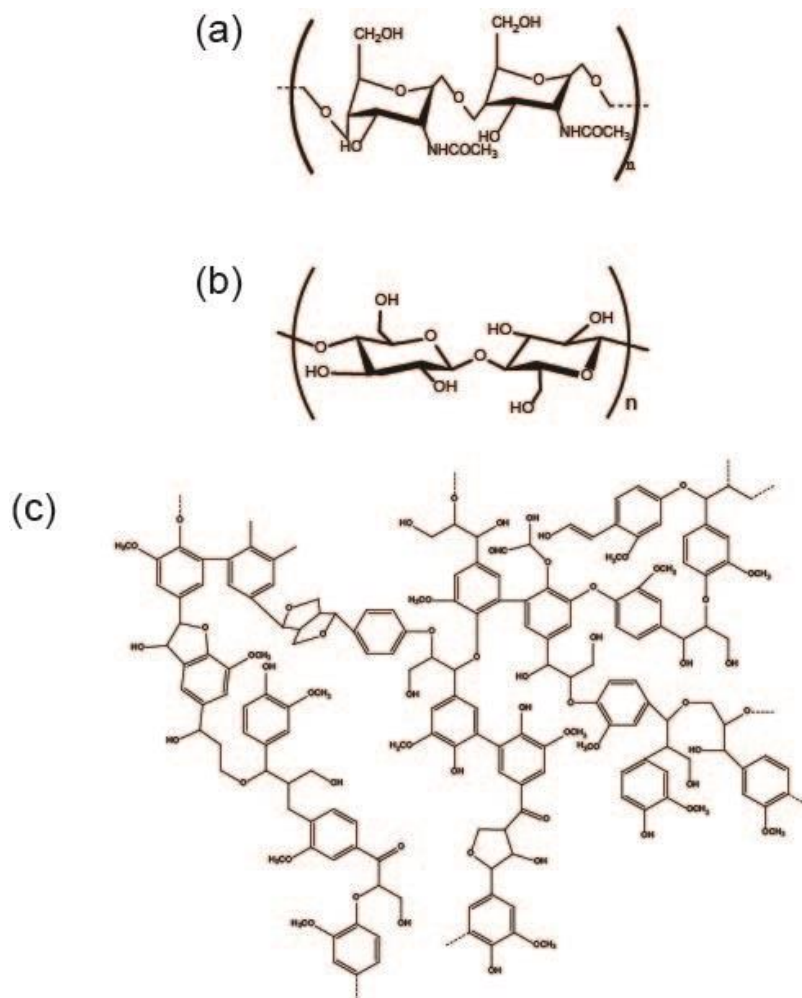

**Figure S1.** Molecular structure of (a) chitin and (b) cellulose. (c) Molecular model of lignin.<sup>S1</sup>

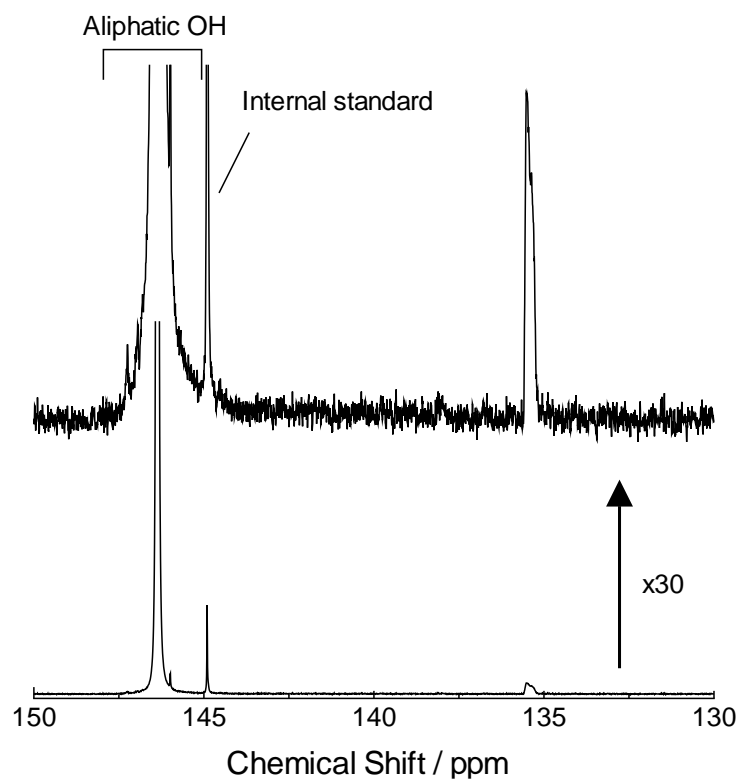

**Figure S2.**  $^{31}\text{P}$  NMR spectrum of the lignin sample.

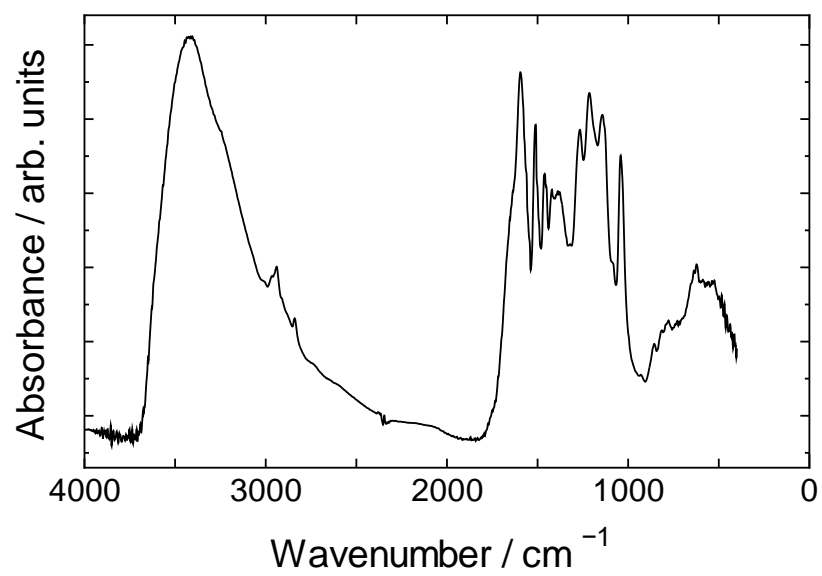

**Figure S3.** FTIR spectrum of the lignin sample.

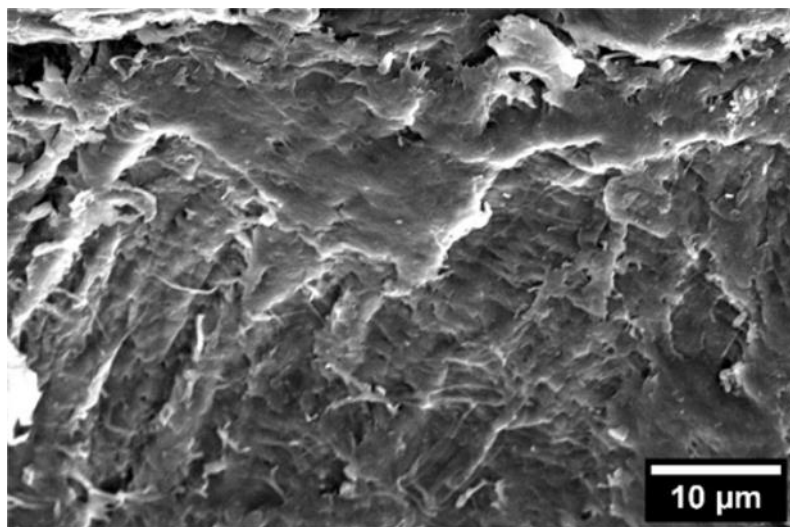

**Figure S4.** SEM image of carbonized lignin sample without pre-treatments.

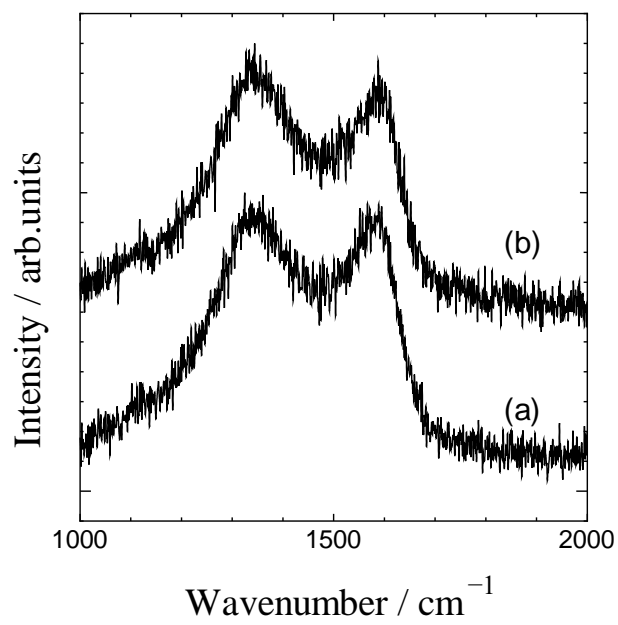

**Figure S5.** Raman spectra of (a) Lignin-C and (b) N-Lignin-C samples.

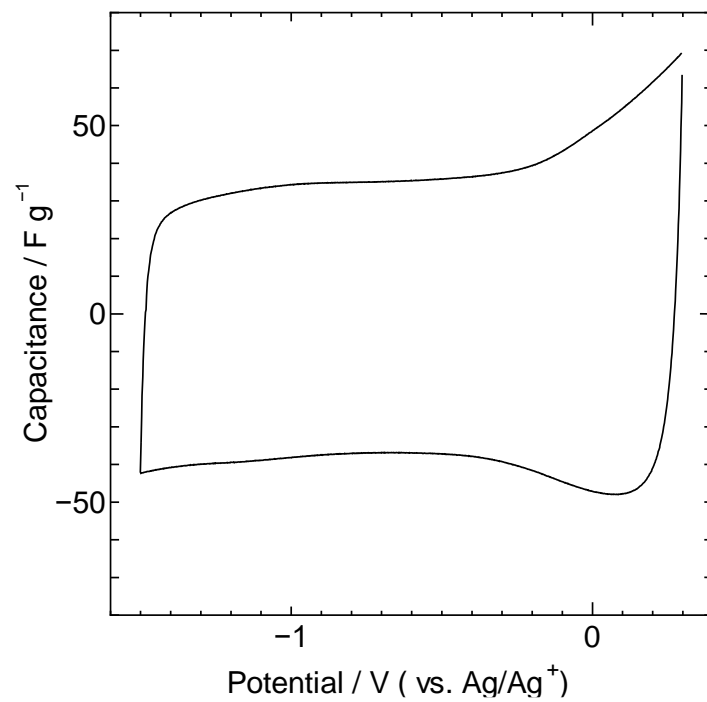

**Figure S6.** CV curve of Cellulose-C sample measured at a potential sweep rate of 5 mV/s in organic electrolyte.

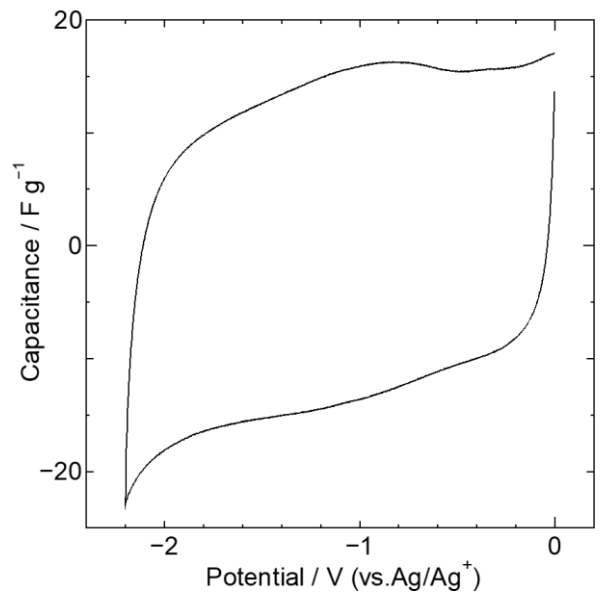

**Figure S7.** CV curve of Lignin-C sample measured at a potential sweep rate of 5 mV/s in organic electrolyte.



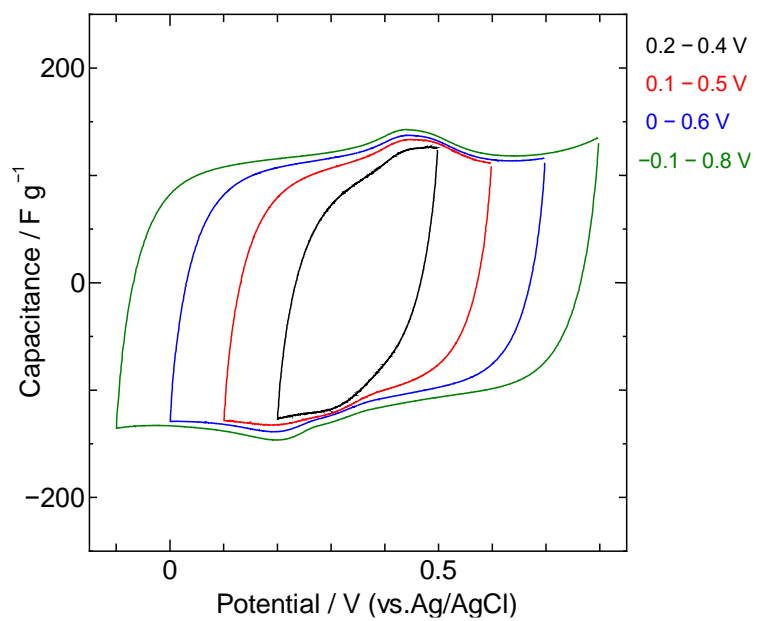

**Figure S8.** CV curves of N-Lignin-C sample measured at a potential sweep rate of 5 mV/s in 1M H<sub>2</sub>SO<sub>4</sub> aqueous electrolyte with increasing potential window.

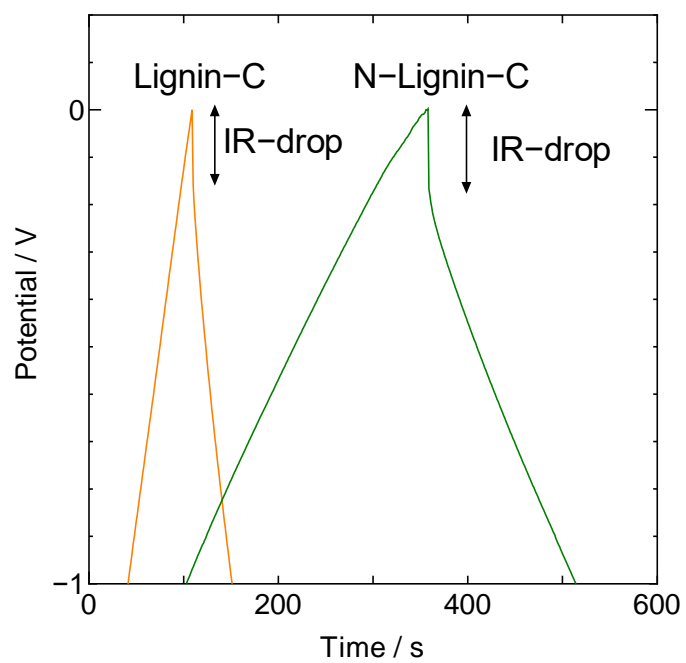

**Figure S9.** Charge-discharge curves of Lignin-C and N-Lignin-C in 1M TEMA-BF<sub>4</sub>/PC electrolyte at current density of 50 mA/g. IR-drop values shown in the graph are almost the same for the two samples.

## References

[S1] D. Watkins *et al.* *J. Mater. Res. Tech.* **4**, 26-32 (2015).
